# Supplementary material for: Molecular Characterization and Pathogenicity of Alternaria spp. Associated with Black Rot of Sweet Cherries in Italy
Source: MDPI journal article supplement (doi:10.3390/jof9100992), 2023-10-07
Supplement: s1 [file s1]

## Supplementary Materials

**Table S1.** Collection details and GenBank accession numbers of strains isolated from sweet cherries in Italy and reference strains included in this study for the phylogenetic analysis.

| Species                         | Isolate                                                             | Location     | Host                           | rpb2     | Alt a 1  | endoPG   | OPA10-2  |
|---------------------------------|---------------------------------------------------------------------|--------------|--------------------------------|----------|----------|----------|----------|
| <i>Alternaria alstroemeriae</i> | CBS 118808; E.G.S. 50.116                                           | USA          | <i>Alstroemeria</i> sp.        | KP124764 | KP123845 | KP123993 | KP124601 |
| <i>A. alternata</i>             | CBS 107.27; ATCC 24463; QM 1736 ( <i>A. citri</i> )                 | USA          | <i>Citrus limonium</i>         | KP124768 | KP123849 | KP123996 | KP124604 |
| <i>A. alternata</i>             | CBS 103.33; E.G.S. 35.182; IHEM 3319 ( <i>A. soliaegyptiaca</i> )   | Egypt        | soil                           | KP124770 | KP123852 | KP123999 | KP124607 |
| <i>A. alternata</i>             | CBS 117.44; E.G.S. 06.190; VKM F-1870 ( <i>A. godetiae</i> )        | Denmark      | <i>Godetia</i> sp.             | KP124772 | KP123854 | KP124001 | KP124609 |
| <i>A. alternata</i>             | CBS 102.47; E.G.S. 02.062 ( <i>A. citri</i> )                       | USA          | <i>Citrus sinensis</i>         | KP124773 | KP123855 | KP124002 | KP124610 |
| <i>A. alternata</i>             | CBS 174.52; E.G.S. 39.1613; IMI 068086; QM 1278                     | USA          | <i>Anemone occidentalis</i>    | DQ677964 | KP123856 | KP124003 | KP124611 |
| <i>A. alternata</i>             | CBS 175.52; E.G.S. 35.1619; IMI 068085; QM 1277                     | USA          | <i>Juncus mertensianus</i>     | KC584445 | KP123857 | KP124004 | KP124612 |
| <i>A. alternata</i>             | CBS 107.53; DSM 3187; IFO 5778 ( <i>A. kikuchiana</i> )             | Japan        | <i>Pyrus pyrifolia</i>         | KP124774 | KP123858 | KP124005 | KP124613 |
| <i>A. alternata</i>             | CBS 612.72; DSM 62012 ( <i>A. cinerariae</i> )                      | Germany      | <i>Senecio cineraria</i>       | KP124777 | KP123861 | KP124008 | KP124615 |
| <i>A. alternata</i>             | CBS 620.83; ATCC 15052 ( <i>A. tenuissima</i> )                     | USA          | <i>Nicotiana tabacum</i>       | KP124783 | KP123868 | KP124015 | KP124622 |
| <i>A. alternata</i>             | CBS 195.86; E.G.S. 36.172; DAOM 185214 ( <i>A. angustiovoidea</i> ) | Canada       | <i>Euphorbia esula</i>         | KP124785 | JQ646398 | KP124017 | KP124624 |
| <i>A. alternata</i>             | CBS 965.95; IMI 289679 ( <i>A. tenuissima</i> )                     | India        | <i>Triticum</i> sp.            | KP124791 | KP123872 | KP124023 | KP124629 |
| <i>A. alternata</i>             | CBS 918.96; E.G.S. 34.015; IMI 255532 ( <i>A. tenuissima</i> )      | UK           | <i>Dianthus chinensis</i>      | KC584435 | AY563302 | KP124026 | KP124633 |
| <i>A. alternata</i>             | CBS 639.97; IMI 366417                                              | Greece       | <i>Helianthus annuus</i>       | KP124795 | KP123876 | KP124028 | KP124635 |
| <i>A. alternata</i>             | CBS 102595; E.G.S. 45.100 ( <i>A. limoniasperae</i> )               | USA          | <i>Citrus jambhiri</i>         | KC584408 | AY563306 | KP124029 | KP124636 |
| <i>A. alternata</i>             | CBS 102599; E.G.S. 44.166 ( <i>A. turkisafria</i> )                 | Turkey       | <i>Minneola tangelo</i>        | KP124798 | KP123879 | KP124032 | KP124639 |
| <i>A. alternata</i>             | CBS 102600; E.G.S. 39.181; ATCC 38963                               | USA          | <i>Citrus reticulata</i>       | KP124799 | KP123880 | KP124033 | KP124640 |
| <i>A. alternata</i>             | CBS 113054; CPC 4263 ( <i>A. tenuissima</i> )                       | South Africa | <i>Malus domestica</i>         | KP124814 | KP123894 | KP124047 | KP124656 |
| <i>A. alternata</i>             | CBS 115069; CPC 4254 ( <i>A. tenuissima</i> )                       | South Africa | <i>Malus domestica</i>         | KP124815 | KP123895 | KP124048 | KP124657 |
| <i>A. alternata</i>             | CBS 119115                                                          | Greece       | <i>Prunus</i> sp.              | KP124828 | KP123909 | KP124062 | np*      |
| <i>A. alternata</i>             | CBS 120829                                                          | Greece       | <i>Punica granatum</i>         | KP124832 | KP123912 | KP124066 | KP124675 |
| <i>A. alternata</i>             | CBS 121346; E.G.S. 45.056 ( <i>A. turkisafria</i> )                 | South Africa | <i>Minneola tangelo</i>        | KP124835 | KP123914 | KP124069 | KP124678 |
| <i>A. alternata</i>             | CBS 121455; E.G.S. 50.078 ( <i>A. broussonetiae</i> )               | China        | <i>Broussonetia papyrifera</i> | KP124838 | KP123916 | KP124072 | KP124681 |
| <i>A. alternata</i>             | CBS 121492; HSAUP0207 ( <i>Ulocladium cucumisis</i> )               | China        | <i>Cucumis melo</i>            | KP124840 | KP123918 | KP124074 | KP124683 |

|                          |                                                               |              |                             |          |          |          |          |
|--------------------------|---------------------------------------------------------------|--------------|-----------------------------|----------|----------|----------|----------|
| <i>A. alternata</i>      | CBS 126071 ( <i>A. tenuissima</i> )                           | Namibia      | soil                        | KP124846 | KP123924 | KP124080 | KP124689 |
| <i>A. alternata</i>      | CBS 127671; E.G.S. 52.121 ( <i>A. seleniiphila</i> )          | USA          | <i>Stanleya pinnata</i>     | KP124851 | KP123929 | KP124085 | KP124694 |
| <i>A. alternata</i>      | T6                                                            | Italy        | <i>Prunus avium</i>         | OP899743 | OP899663 | OP899703 | OQ607083 |
| <i>A. alternata</i>      | GR3                                                           | Italy        | <i>P. avium</i>             | OP899747 | OP899667 | OP899707 | OQ607084 |
| <i>A. alternata</i>      | GR13                                                          | Italy        | <i>P. avium</i>             | OP899750 | OP899670 | OP899710 | OQ607085 |
| <i>A. alternata</i>      | Ch21                                                          | Italy        | <i>P. avium</i>             | OP899767 | OP899687 | OP899727 | OQ607086 |
| <i>A. alternata</i>      | Ch23                                                          | Italy        | <i>P. avium</i>             | OP899769 | OP899689 | OP899729 | OQ607087 |
| <i>A. alternata</i>      | Ch37                                                          | Italy        | <i>P. avium</i>             | OP899773 | OP899693 | OP899733 | OQ607088 |
| <i>A. alternata</i>      | Ch43                                                          | Italy        | <i>P. avium</i>             | OP899777 | OP899697 | OP899737 | OQ607089 |
| <i>A. arborescens</i> SC | CBS 101.13; E.G.S. 07.022; QM1765 ( <i>A. geophila</i> )      | Switzerland  | peat soil                   | KP124862 | KP123940 | KP124096 | KP124705 |
| <i>A. arborescens</i> SC | CBS 105.24; IHEM 3123 ( <i>A. alternata</i> )                 | Unknown      | <i>Solanum tuberosum</i>    | KP124863 | KP123941 | KP124097 | KP124706 |
| <i>A. arborescens</i> SC | CBS 108.41; E.G.S. 44.087; ATCC 11892 ( <i>A. alternata</i> ) | Unknown      | wood                        | KP124864 | KP123942 | KP124098 | KP124707 |
| <i>A. arborescens</i> SC | CBS 113.41; IHEM 3318 ( <i>A. alternata</i> )                 | Unknown      | <i>Schizanthus</i> sp.      | KP124865 | KP123943 | KP124099 | KP124708 |
| <i>A. arborescens</i> SC | CBS 105.49 ( <i>A. alternata</i> )                            | Italy        | contaminant blood culture   | KP124866 | KP123944 | KP124100 | KP124709 |
| <i>A. arborescens</i> SC | CBS 126.60; IMI 081622 ( <i>A. maritima</i> )                 | UK           | wood                        | KP124867 | JQ646390 | KP124101 | KP124710 |
| <i>A. arborescens</i> SC | CBS 750.68; LCP 68.1989 ( <i>A. tenuissima</i> )              | France       | <i>Phaseolus vulgaris</i>   | KP124868 | KP123945 | KP124102 | KP124711 |
| <i>A. arborescens</i> SC | CBS 102605; E.G.S. 39.128 ( <i>A. arborescens</i> )           | USA          | <i>Solanum lycopersicum</i> | KC584377 | AY563303 | AY295028 | KP124712 |
| <i>A. arborescens</i> SC | CBS 109730 ( <i>A. arborescens</i> )                          | USA          | <i>Solanum lycopersicum</i> | KP124869 | KP123946 | KP124103 | KP124713 |
| <i>A. arborescens</i> SC | CBS 112633; CPC 4244 ( <i>A. arborescens</i> )                | South Africa | <i>Malus domestica</i>      | KP124870 | KP123947 | KP124104 | KP124714 |
| <i>A. arborescens</i> SC | CBS 112749; CPC 4245 ( <i>A. arborescens</i> )                | South Africa | <i>Malus domestica</i>      | KP124871 | KP123948 | KP124105 | KP124715 |
| <i>A. arborescens</i> SC | CBS 115189; CPC 4345 ( <i>A. arborescens</i> )                | South Africa | <i>Citrus clementina</i>    | KP124872 | KP123949 | KP124106 | KP124716 |
| <i>A. arborescens</i> SC | CBS 115516; CPC 4247 ( <i>A. arborescens</i> )                | South Africa | <i>Malus domestica</i>      | KP124873 | KP123950 | KP124107 | KP124717 |
| <i>A. arborescens</i> SC | CBS 115517; CPC 4246 ( <i>A. arborescens</i> )                | South Africa | <i>Malus domestica</i>      | KP124874 | KP123951 | KP124108 | KP124718 |
| <i>A. arborescens</i> SC | CBS 116329 ( <i>A. alternata</i> )                            | Germany      | <i>Malus domestica</i>      | KP124875 | KP123952 | KP124109 | KP124719 |
| <i>A. arborescens</i> SC | CBS 117587 ( <i>A. alternata</i> )                            | Netherlands  | <i>Brassica</i> sp.         | KP124876 | KP123953 | KP124110 | KP124720 |
| <i>A. arborescens</i> SC | CBS 118389; E.G.S. 90.131 ( <i>A. gaisen</i> )                | Japan        | <i>Pyrus pyrifolia</i>      | KP124877 | KP123954 | KP124111 | KP124721 |
| <i>A. arborescens</i> SC | CBS 119544; E.G.S. 43.072 ( <i>A. cerealis</i> )              | New Zealand  | <i>Avena sativa</i>         | KP124878 | KP123955 | KP124112 | KP124722 |
| <i>A. arborescens</i> SC | CBS 119545; E.G.S. 48.130 ( <i>A. senecionicola</i> )         | New Zealand  | <i>Senecio skirrhodon</i>   | KP124879 | KP123956 | KP124113 | KP124723 |

|                          |                                      |         |                        |          |          |          |          |
|--------------------------|--------------------------------------|---------|------------------------|----------|----------|----------|----------|
| <i>A. arborescens</i> SC | CBS 123235 ( <i>A. alternata</i> )   | Denmark | human toenail          | KP124880 | KP123957 | KP124114 | KP124724 |
| <i>A. arborescens</i> SC | CBS 123266 ( <i>A. alternata</i> )   | Denmark | human toenail          | KP124881 | KP123958 | KP124115 | KP124725 |
| <i>A. arborescens</i> SC | CBS 123267 ( <i>A. alternata</i> )   | Denmark | human nail             | KP124882 | KP123959 | KP124116 | KP124726 |
| <i>A. arborescens</i> SC | CBS 124281 ( <i>A. arborescens</i> ) | Denmark | <i>Triticum</i> sp.    | KP124883 | KP123961 | KP124118 | KP124728 |
| <i>A. arborescens</i> SC | CBS 124282 ( <i>A. arborescens</i> ) | Denmark | <i>Hordeum vulgare</i> | KP124884 | KP123962 | KP124119 | KP124729 |
| <i>A. arborescens</i> SC | CBS 124283 ( <i>A. tenuissima</i> )  | Russia  | <i>Oryza</i> sp.       | KP124885 | KP123963 | KP124120 | KP124730 |
| <i>A. arborescens</i> SC | CBS 127263 ( <i>A. alternata</i> )   | Mexico  | Human nasal infection  | KP124886 | KP123964 | KP124121 | KP124731 |
| <i>A. arborescens</i> SC | D4                                   | Italy   | <i>P. avium</i>        | OP899740 | OP899660 | OP899700 | OQ607090 |
| <i>A. arborescens</i> SC | T2                                   | Italy   | <i>P. avium</i>        | OP899741 | OP899661 | OP899701 | OQ607091 |
| <i>A. arborescens</i> SC | T3                                   | Italy   | <i>P. avium</i>        | OP899742 | OP899662 | OP899702 | OQ607092 |
| <i>A. arborescens</i> SC | T8                                   | Italy   | <i>P. avium</i>        | OP899744 | OP899664 | OP899704 | OQ607093 |
| <i>A. arborescens</i> SC | T9                                   | Italy   | <i>P. avium</i>        | OP899745 | OP899665 | OP899705 | OQ607094 |
| <i>A. arborescens</i> SC | GR1                                  | Italy   | <i>P. avium</i>        | OP899746 | OP899666 | OP899706 | OQ607095 |
| <i>A. arborescens</i> SC | GR6                                  | Italy   | <i>P. avium</i>        | OP899748 | OP899668 | OP899708 | OQ607096 |
| <i>A. arborescens</i> SC | GR8                                  | Italy   | <i>P. avium</i>        | OP899749 | OP899669 | OP899709 | OQ607097 |
| <i>A. arborescens</i> SC | W2                                   | Italy   | <i>P. avium</i>        | OP899751 | OP899671 | OP899711 | OQ607098 |
| <i>A. arborescens</i> SC | W6                                   | Italy   | <i>P. avium</i>        | OP899752 | OP899672 | OP899712 | OQ607099 |
| <i>A. arborescens</i> SC | Q1                                   | Italy   | <i>P. avium</i>        | OP899753 | OP899673 | OP899713 | OQ607100 |
| <i>A. arborescens</i> SC | X7                                   | Italy   | <i>P. avium</i>        | OP899754 | OP899674 | OP899714 | OQ607101 |
| <i>A. arborescens</i> SC | Ch1                                  | Italy   | <i>P. avium</i>        | OP899755 | OP899675 | OP899715 | OQ607102 |
| <i>A. arborescens</i> SC | Ch2                                  | Italy   | <i>P. avium</i>        | OP899756 | OP899676 | OP899716 | OQ607103 |
| <i>A. arborescens</i> SC | Ch4                                  | Italy   | <i>P. avium</i>        | OP899757 | OP899677 | OP899717 | OQ607104 |
| <i>A. arborescens</i> SC | Ch5                                  | Italy   | <i>P. avium</i>        | OP899758 | OP899678 | OP899718 | OQ607105 |
| <i>A. arborescens</i> SC | Ch11                                 | Italy   | <i>P. avium</i>        | OP899759 | OP899679 | OP899719 | OQ607106 |
| <i>A. arborescens</i> SC | Ch12                                 | Italy   | <i>P. avium</i>        | OP899760 | OP899680 | OP899720 | OQ607107 |
| <i>A. arborescens</i> SC | Ch13                                 | Italy   | <i>P. avium</i>        | OP899761 | OP899681 | OP899721 | OQ607108 |
| <i>A. arborescens</i> SC | Ch14                                 | Italy   | <i>P. avium</i>        | OP899762 | OP899682 | OP899722 | OQ607109 |
| <i>A. arborescens</i> SC | Ch16                                 | Italy   | <i>P. avium</i>        | OP899763 | OP899683 | OP899723 | OQ607110 |
| <i>A. arborescens</i> SC | Ch17                                 | Italy   | <i>P. avium</i>        | OP899764 | OP899684 | OP899724 | OQ607111 |
| <i>A. arborescens</i> SC | Ch18                                 | Italy   | <i>P. avium</i>        | OP899765 | OP899685 | OP899725 | OQ607112 |

|                                   |                                                |           |                             |          |          |          |          |
|-----------------------------------|------------------------------------------------|-----------|-----------------------------|----------|----------|----------|----------|
| <i>A. arborescens</i> SC          | Ch19                                           | Italy     | <i>P. avium</i>             | OP899766 | OP899686 | OP899726 | OQ607113 |
| <i>A. arborescens</i> SC          | Ch22                                           | Italy     | <i>P. avium</i>             | OP899768 | OP899688 | OP899728 | OQ607114 |
| <i>A. arborescens</i> SC          | Ch26                                           | Italy     | <i>P. avium</i>             | OP899770 | OP899690 | OP899730 | OQ607115 |
| <i>A. arborescens</i> SC          | Ch27                                           | Italy     | <i>P. avium</i>             | OP899771 | OP899691 | OP899731 | OQ607116 |
| <i>A. arborescens</i> SC          | Ch35                                           | Italy     | <i>P. avium</i>             | OP899772 | OP899692 | OP899732 | OQ607117 |
| <i>A. arborescens</i> SC          | Ch39                                           | Italy     | <i>P. avium</i>             | OP899774 | OP899694 | OP899734 | OQ607118 |
| <i>A. arborescens</i> SC          | Ch40                                           | Italy     | <i>P. avium</i>             | OP899775 | OP899695 | OP899735 | OQ607119 |
| <i>A. arborescens</i> SC          | Ch42                                           | Italy     | <i>P. avium</i>             | OP899776 | OP899696 | OP899736 | OQ607120 |
| <i>A. arborescens</i> SC          | Ch45                                           | Italy     | <i>P. avium</i>             | OP899778 | OP899698 | OP899738 | OQ607121 |
| <i>A. arborescens</i> SC          | Ch48                                           | Italy     | <i>P. avium</i>             | OP899779 | OP899699 | OP899739 | OQ607122 |
| <i>Alternaria betae-kenyensis</i> | CBS 118810; E.G.S. 49.159; IMI 385709          | Kenya     | Beta vulgaris var. cicla    | KP124888 | KP123966 | KP124123 | KP124733 |
| <i>Alternaria burnsii</i>         | CBS 107.38; E.G.S. 06.185                      | India     | <i>Cuminum cyminum</i>      | KP124889 | KP123967 | KP124124 | KP124734 |
| <i>Alternaria eichhorniae</i>     | CBS 489.92; ATCC 22255; ATCC 46777; IMI 121518 | India     | <i>Eichhornia crassipes</i> | KP124895 | KP123973 | KP124130 | KP124740 |
| <i>Alternaria gaisen</i>          | CBS 632.93; E.G.S. 90.512                      | Japan     | <i>Pyrus pyrifolia</i>      | KC584399 | KP123974 | AY295033 | KP124742 |
| <i>Alternaria gossypina</i>       | CBS 104.32                                     | Zimbabwe  | <i>Gossypium</i> sp.        | KP124900 | JQ646395 | KP124135 | KP124746 |
| <i>Alternaria iridialustralis</i> | CBS 118486; E.G.S. 43.014                      | Australia | <i>Iris</i> sp.             | KP124905 | KP123981 | KP124140 | KP124751 |
| <i>Alternaria jacinthicola</i>    | CBS 133751; MUCL 53159                         | Mali      | <i>Eichhornia crassipes</i> | KP124908 | KP123984 | KP124143 | KP124754 |
| <i>Alternaria longipes</i>        | CBS 121333; E.G.S. 30.051                      | USA       | <i>Nicotiana tabacum</i>    | KP124914 | KP123990 | KP124150 | KP124761 |
| <i>Alternaria tomato</i>          | CBS 103.30                                     | Unknown   | <i>Solanum lycopersicum</i> | KP124915 | KP123991 | KP124151 | KP124762 |
| <i>Alternaria nobilis</i>         | AC1                                            | Japan     | <i>Dianthus barbatus</i>    | LC476798 | LC481624 | LC480952 | np       |

\*np: no product
